# Supplementary material for: SPION@polydehydroalanine hybrid particles
Source: Royal Society of Chemistry journal article supplement (doi:10.1039/c5ra01737h), 2015-01-01
Supplement: c5ra01737h1.pdf [file c5ra01737h1.pdf]

## Supporting Information

### **Fe<sub>3</sub>O<sub>4</sub>@Polydehydroalanine Hybrid Particles**

Moritz von der Lühe,<sup>1,2</sup> Ulrike Günther,<sup>1,2</sup> Andreas Weidner,<sup>3</sup> Christine Gräfe,<sup>4</sup> Joachim H. Clement,<sup>2,4</sup> Silvio Dutz,<sup>3,5</sup> Felix H. Schacher<sup>1,2\*</sup>

<sup>1</sup>Institute of Organic and Macromolecular Chemistry (IOMC), Friedrich Schiller University Jena, Humboldtstraße 10, 07743 Jena, Germany

<sup>2</sup>Jena Center for Soft Matter (JCSM), Friedrich Schiller University Jena, Philosophenweg 7, 07743 Jena, Germany

<sup>3</sup>Institute of Biomedical Engineering and Informatics, Technische Universität Ilmenau, Ilmenau, Germany

<sup>4</sup>Klinik für Innere Medizin II, Abteilung Hämatologie und Internistische Onkologie, Universitätsklinikum Jena, Jena, Germany

<sup>5</sup>Department of Nano Biophotonics, Leibniz Institute of Photonic Technology, Jena, Germany

Email: [felix.schacher@uni-jena.de](mailto:felix.schacher@uni-jena.de)

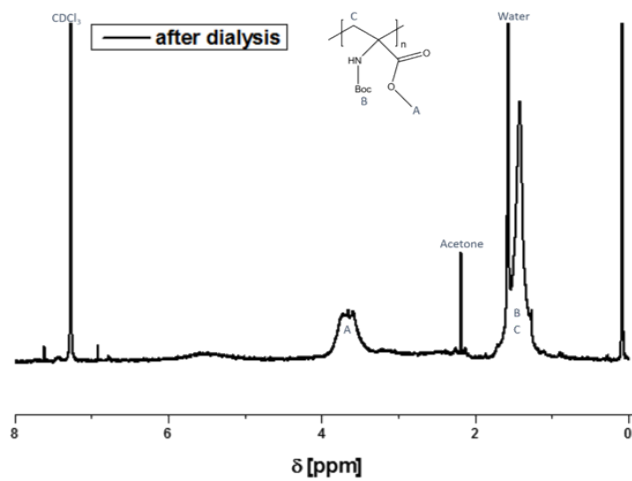

Figure S1: <sup>1</sup>H-NMR spectrum of PtBAMA<sub>184</sub> purified by dialysis against methanol

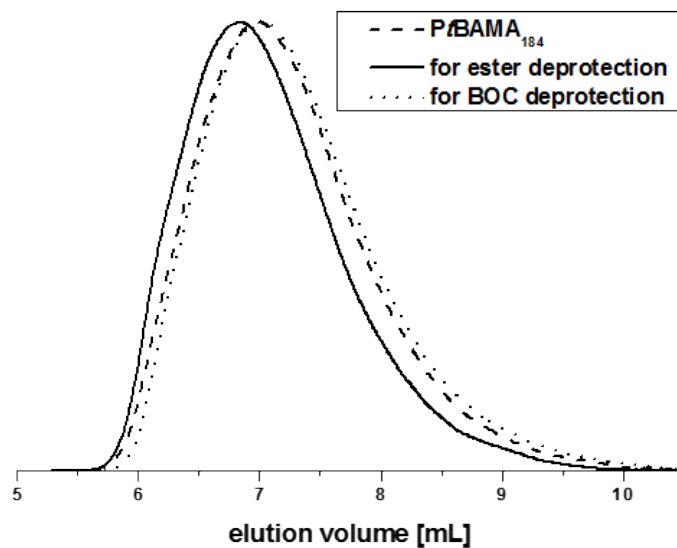

Figure S2: SEC elugrams (DMAc, PMMA calibration) of PtBAMA<sub>184</sub> (different batches, solid black line: SEC:  $M_n = 23\,000$  g/mol, PDI = 1.89).

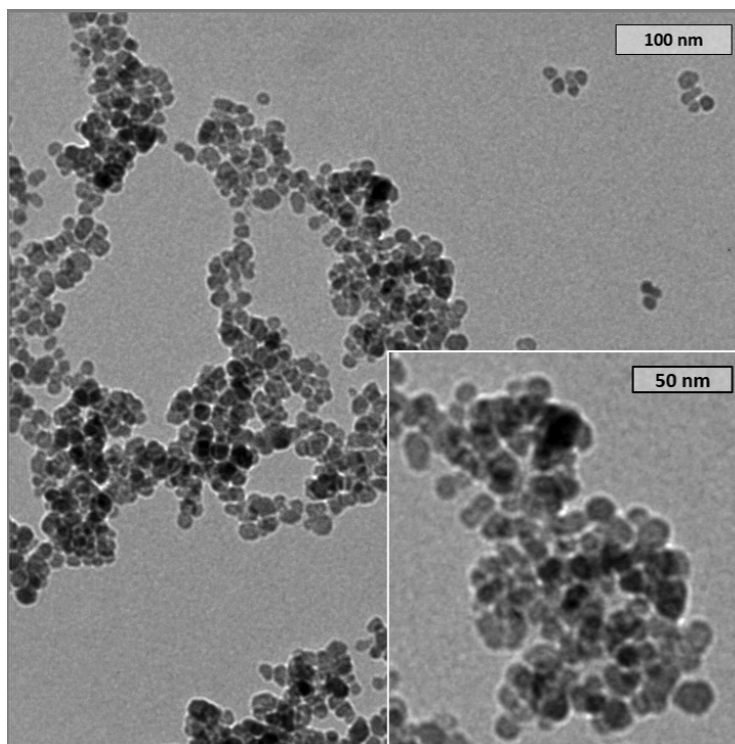

Figure S3: TEM micrograph of pristine SPIONs

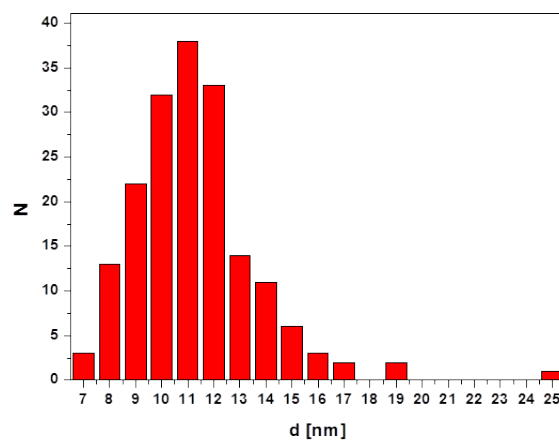

Figure S4: Size distribution of pristine SPIONs ( $n = 180$ , mean diameter of  $12 \pm 2$  nm).

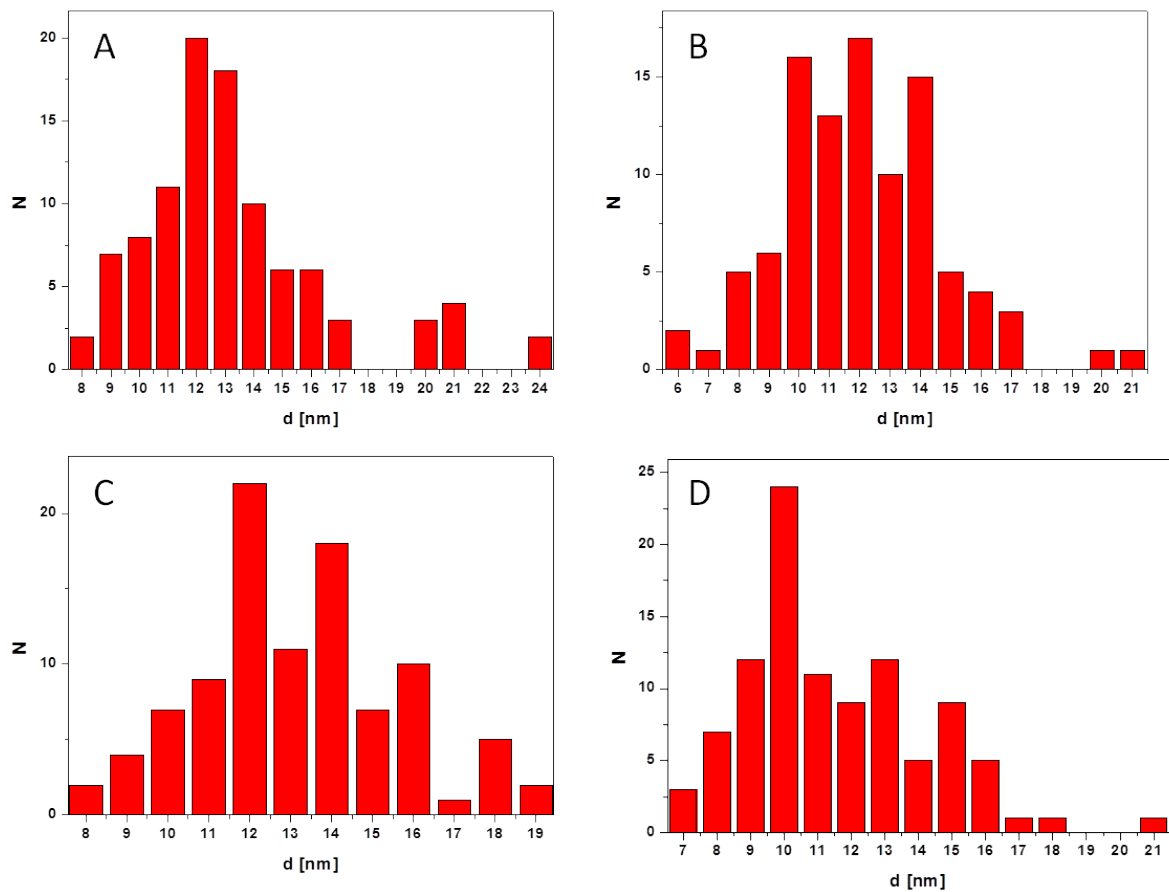

**Figure S5: Size distributions of SPION@PtBAA<sub>184</sub> particles containing different amounts of PtBAA<sub>184</sub>: (A) 1 eq. PtBAA<sub>184</sub>, 13 ± 3 nm; (B) 2 eq. PtBAA<sub>184</sub>, 12 ± 3 nm; (C) 4 eq. PtBAA<sub>184</sub>, 13 ± 2 nm and (D) 8 eq. PtBAA<sub>184</sub>, 12 ± 3 nm (n = 100 in all cases).**

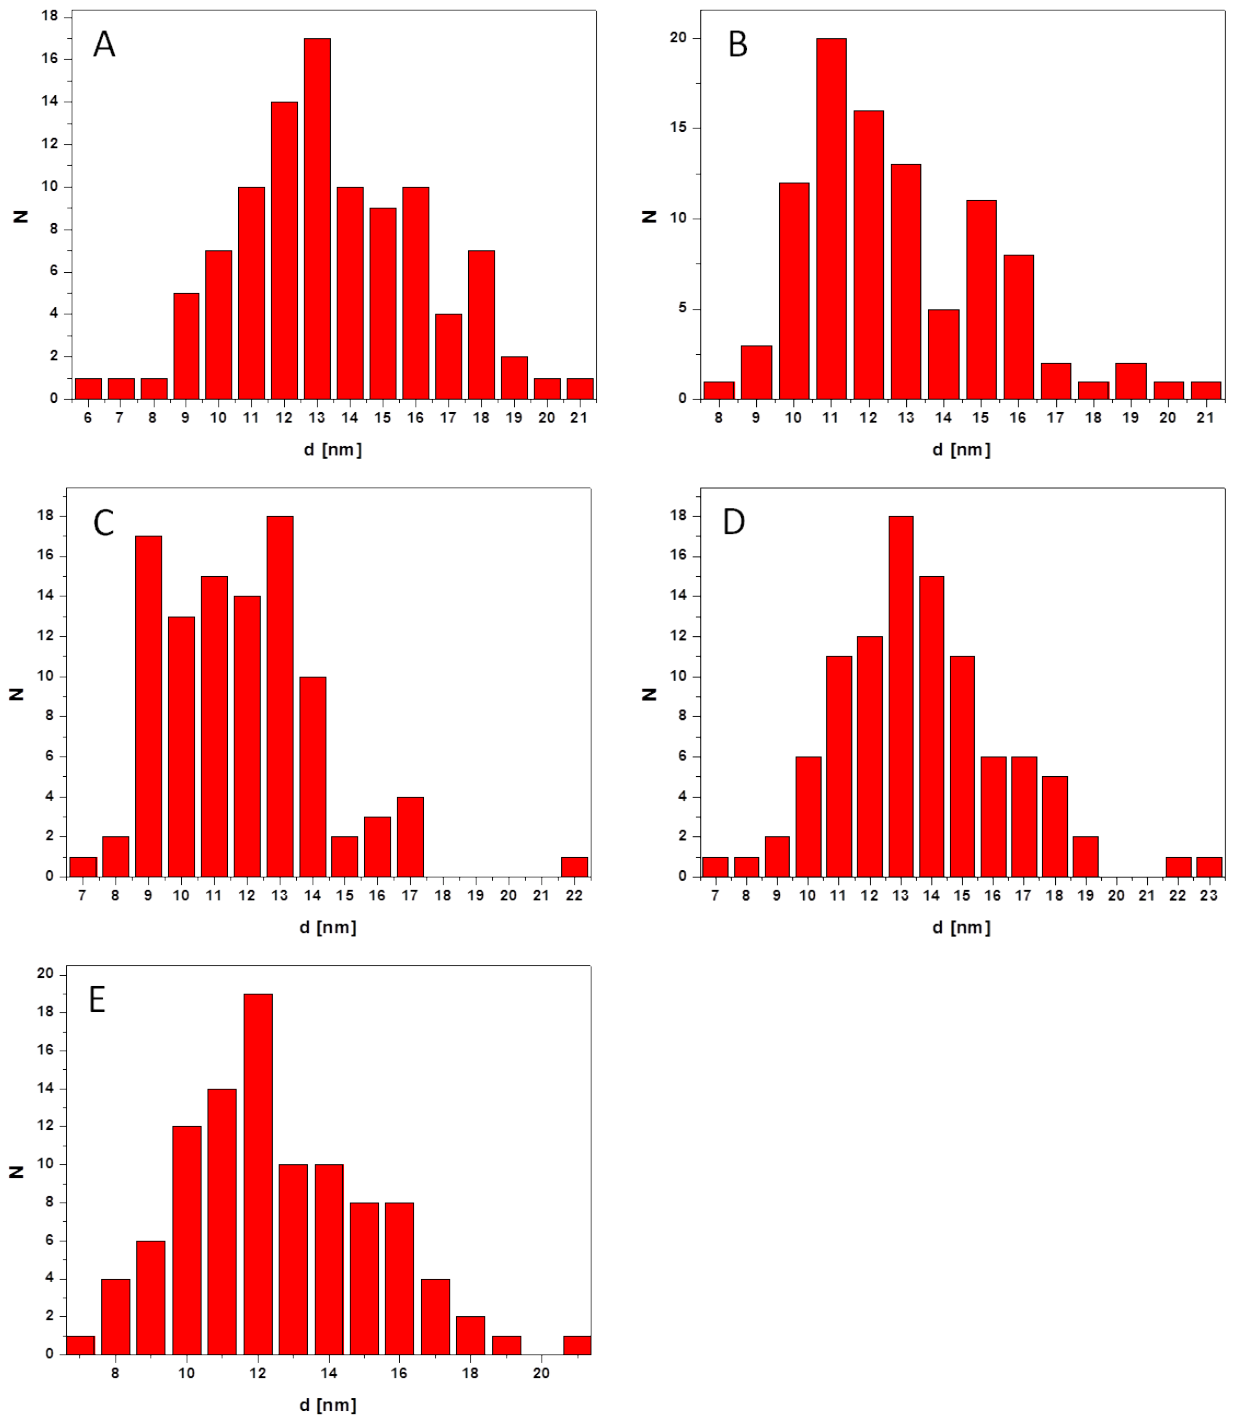

**Figure S6: Size distributions of SPION@PDha<sub>184</sub> particles containing different amounts of PDha<sub>184</sub>: (A) 0.5 eq. PDha<sub>184</sub>,  $13 \pm 3$  nm; (B) 1 eq. PDha<sub>184</sub>,  $13 \pm 3$  nm; (C) 2 eq. PDha<sub>184</sub>,  $12 \pm 2$  nm; (D) 4 eq. PDha<sub>184</sub>,  $14 \pm 3$  nm and (E) 8 eq. PDha<sub>184</sub>,  $13 \pm 3$  nm ( $n = 100$  in all cases).**

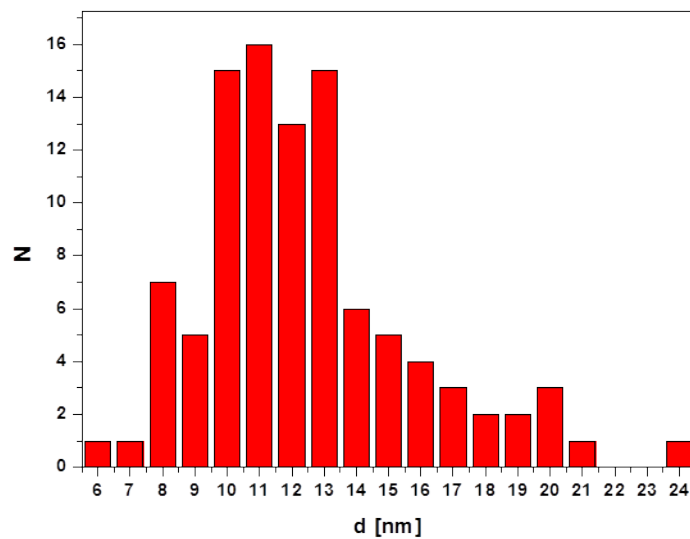

Figure S7: Size distribution of SPION@PAMA particles ( $n = 100$ , mean diameter was  $12 \pm 3$  nm).

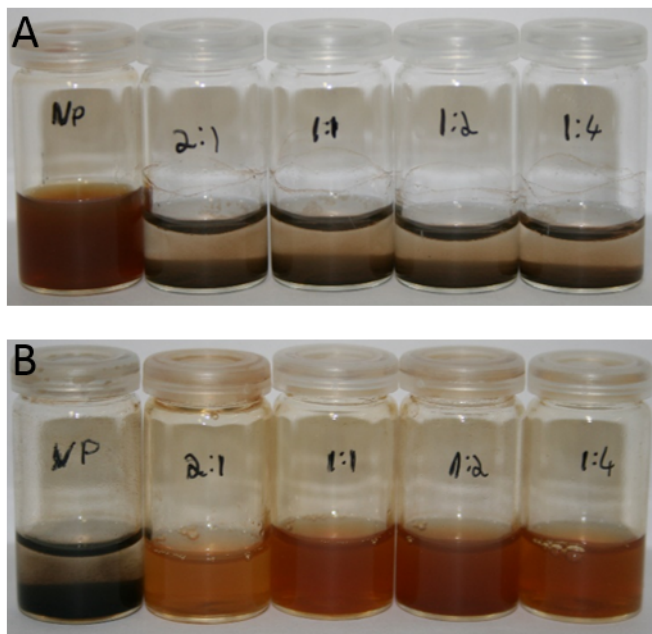

Figure S8: Solution behavior of (A) pristine SPIONs and SPION@PtBAA<sub>184</sub> with different amounts of polymer at pH = 5; (B) pristine SPIONs and SPION@PDha<sub>184</sub> with different amounts of polymer at pH = 10;
